# Supplementary material for: New Glasses in the PbCl2–PbO–B2O3 System: Structure and Optical Properties
Source: MDPI journal article supplement (doi:10.3390/ceramics6030083), 2023-06-27
Supplement: s1 [file s1]

## Supplementary Materials

### NEW GLASSES IN THE $\text{PbCl}_2\text{-PbO-B}_2\text{O}_3$ SYSTEM: STRUCTURE AND OPTICAL PROPERTIES

D.A. Butenkov, A.V. Bakaeva, K.I. Runina, I.M. Krol, M.A. Uslamina,  
A.A. Pynenkov, O.B. Petrova, I. Ch. Avetissov

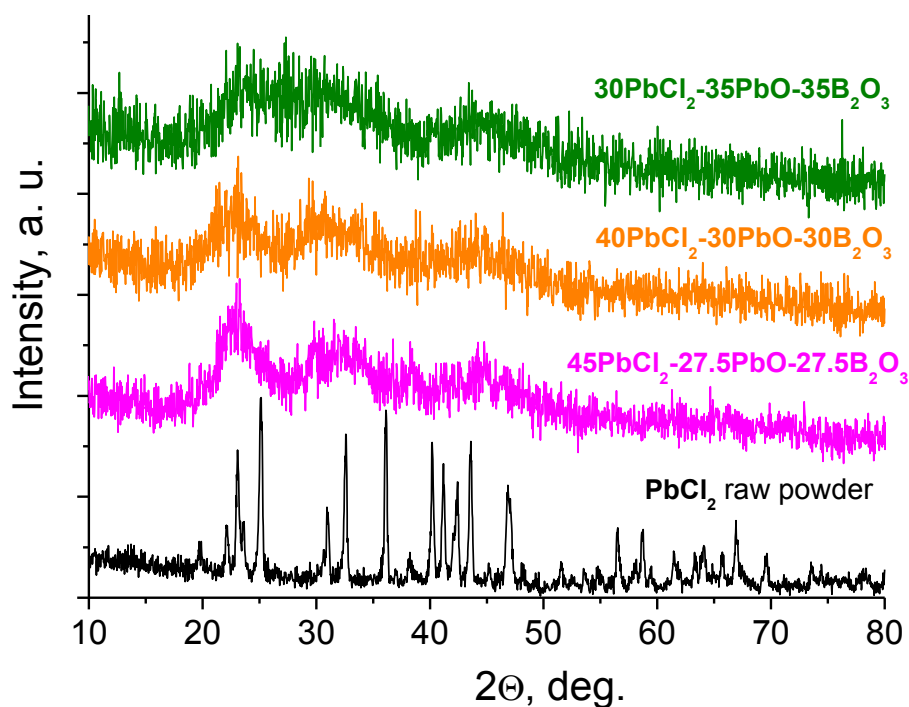

**Figure S1.** Comparison of XRD patterns of glasses of the  $x\text{PbCl}_2\text{-(50-0.5x)PbO-(50-0.5x)B}_2\text{O}_3$  system with crystalline  $\text{PbCl}_2$ .

**Table S1.** The composition of glasses according to the XFS data.

| Nominal glass composition, mol%                                | Nominal ratio, mol% | Experimental ratio, mol% $\pm 0.01$ |       |
|----------------------------------------------------------------|---------------------|-------------------------------------|-------|
|                                                                | Cl/Pb               | Cl/Pb                               | Al/Pb |
| 40PbCl <sub>2</sub> -30PbO-30B <sub>2</sub> O <sub>3</sub>     | 1.14                | 1.17                                | 0.11  |
| 35PbCl <sub>2</sub> -32.5PbO-32.5B <sub>2</sub> O <sub>3</sub> | 1.04                | 1.03                                | 0.11  |
| 33PbCl <sub>2</sub> -33PbO-34B <sub>2</sub> O <sub>3</sub>     | 1.00                | 1.06                                | 0.13  |
| 30PbCl <sub>2</sub> -35PbO-35B <sub>2</sub> O <sub>3</sub>     | 0.92                | 0.94                                | 0.13  |
| 25PbCl <sub>2</sub> -37.5PbO-37.5B <sub>2</sub> O <sub>3</sub> | 0.80                | 0.87                                | 0.13  |
| 20PbCl <sub>2</sub> -40PbO-40B <sub>2</sub> O <sub>3</sub>     | 0.67                | 0.69                                | 0.15  |
| 15PbCl <sub>2</sub> -42.5PbO-42.5B <sub>2</sub> O <sub>3</sub> | 0.52                | 0.73                                | 0.32  |
| 10PbCl <sub>2</sub> -45PbO-45B <sub>2</sub> O <sub>3</sub>     | 0.36                | 0.43                                | 0.42  |
| 5PbCl <sub>2</sub> -47.5PbO-47.5B <sub>2</sub> O <sub>3</sub>  | 0.19                | 0.22                                | 0.31  |
| 50PbO-50B <sub>2</sub> O <sub>3</sub>                          | -                   | -                                   | 0.31  |

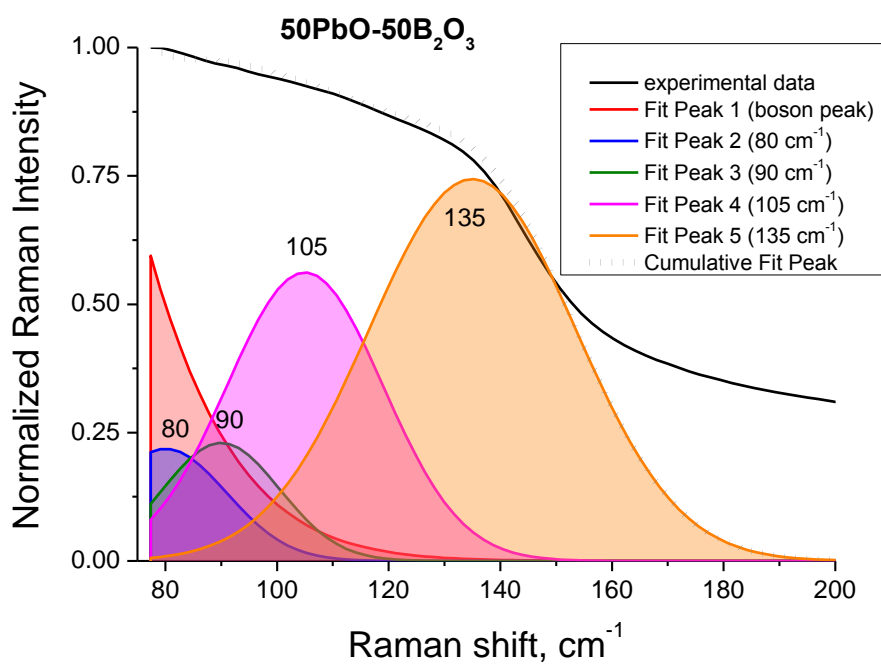

**Figure S2.** Decomposition of the 50PbO-50B<sub>2</sub>O<sub>3</sub> glass Raman spectrum into Gaussians.

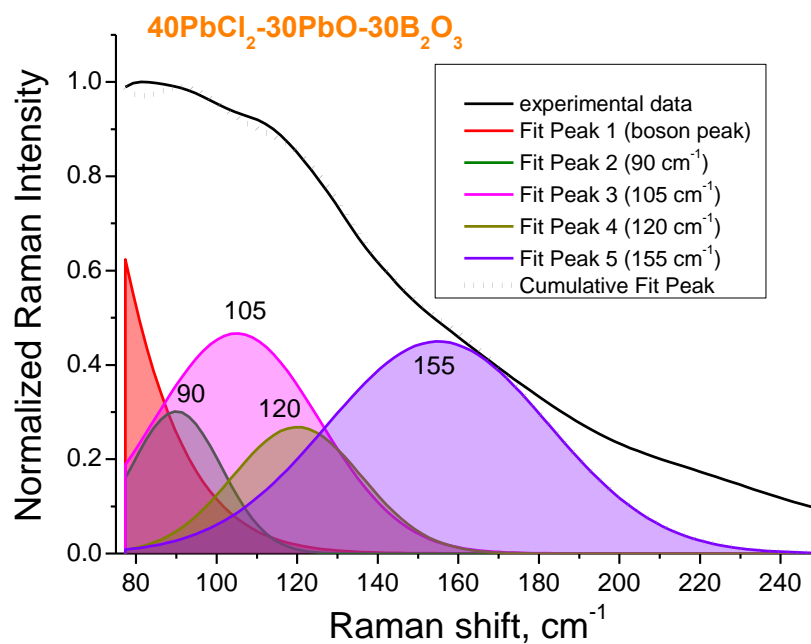

**Figure S3.** Decomposition of the 40PbCl<sub>2</sub>-30PbO-30B<sub>2</sub>O<sub>3</sub> glass Raman spectrum into Gaussians.

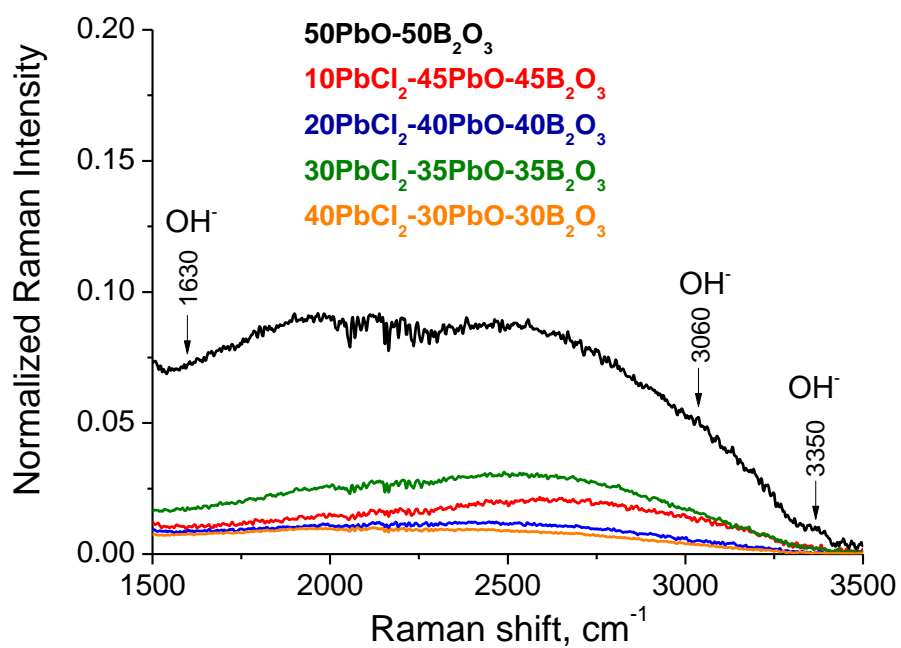

**Figure S4.** Raman spectra of  $x\text{PbCl}_2-(50-0.5x)\text{PbO}-(50-0.5x)\text{B}_2\text{O}_3$  glasses (1750-3500 cm<sup>-1</sup> range).

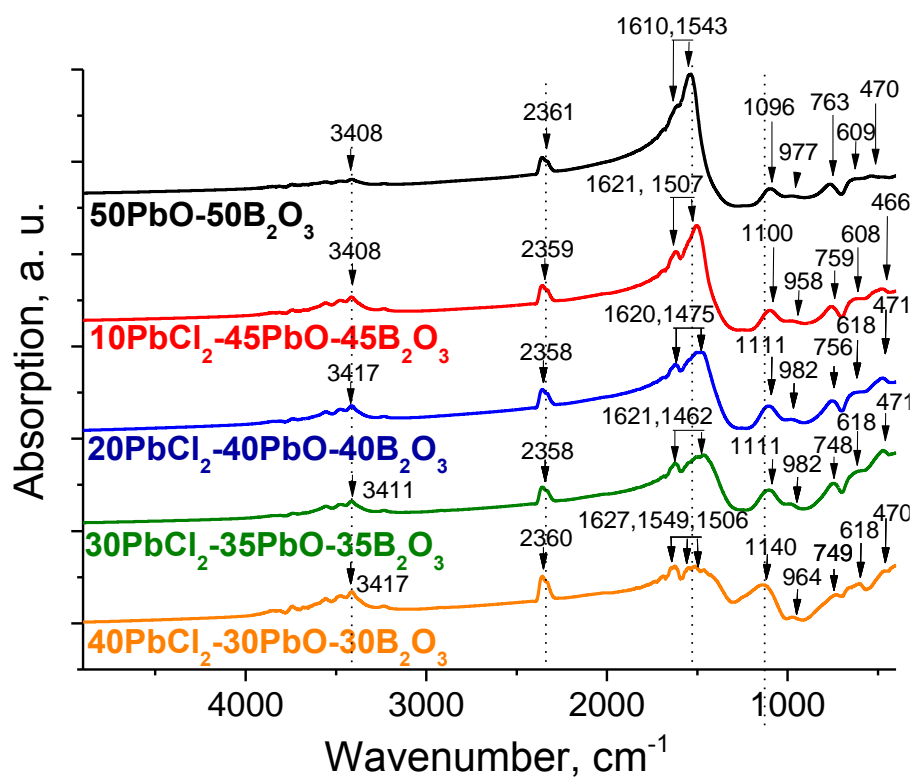

**Figure S5.** FT-IR spectra synthesized glasses.

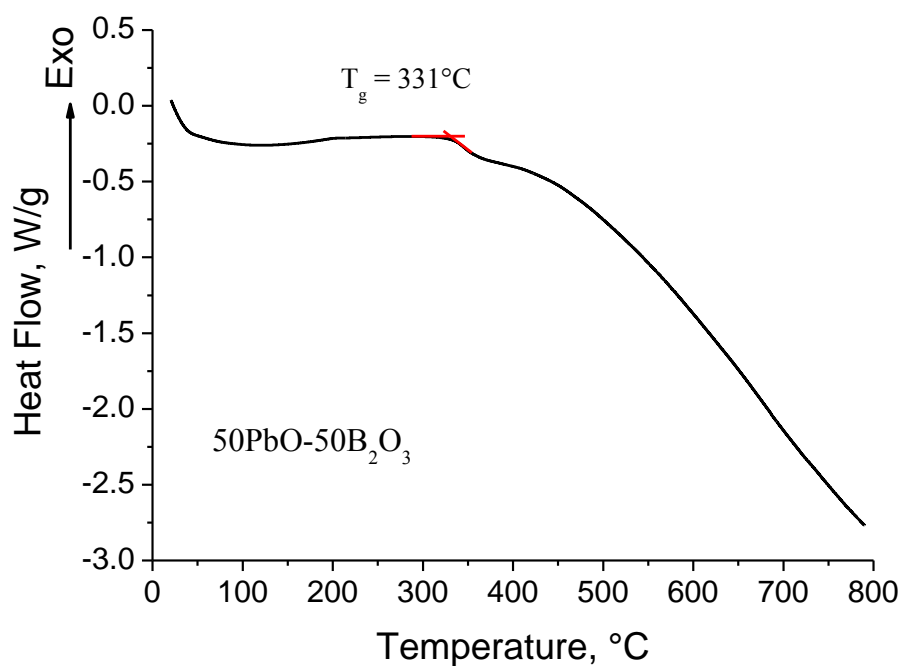

**Figure S6.** DSC curve for glass composition 50PbO-50B<sub>2</sub>O<sub>3</sub>, and characteristic temperatures marked on it.

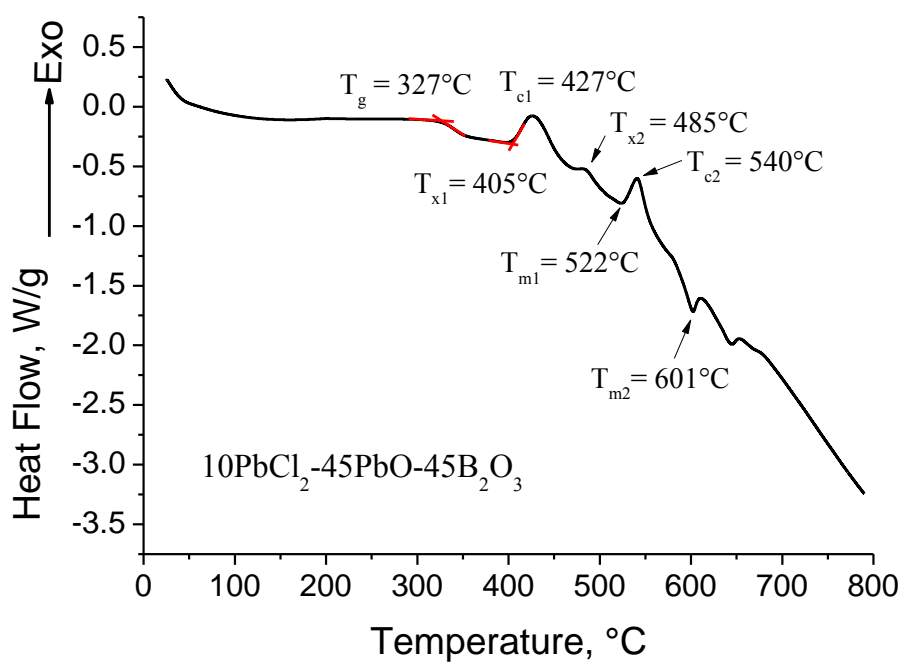

**Figure S7.** DSC curve for glass composition 10PbCl<sub>2</sub>-45PbO-45B<sub>2</sub>O<sub>3</sub>, and characteristic temperatures marked on it.

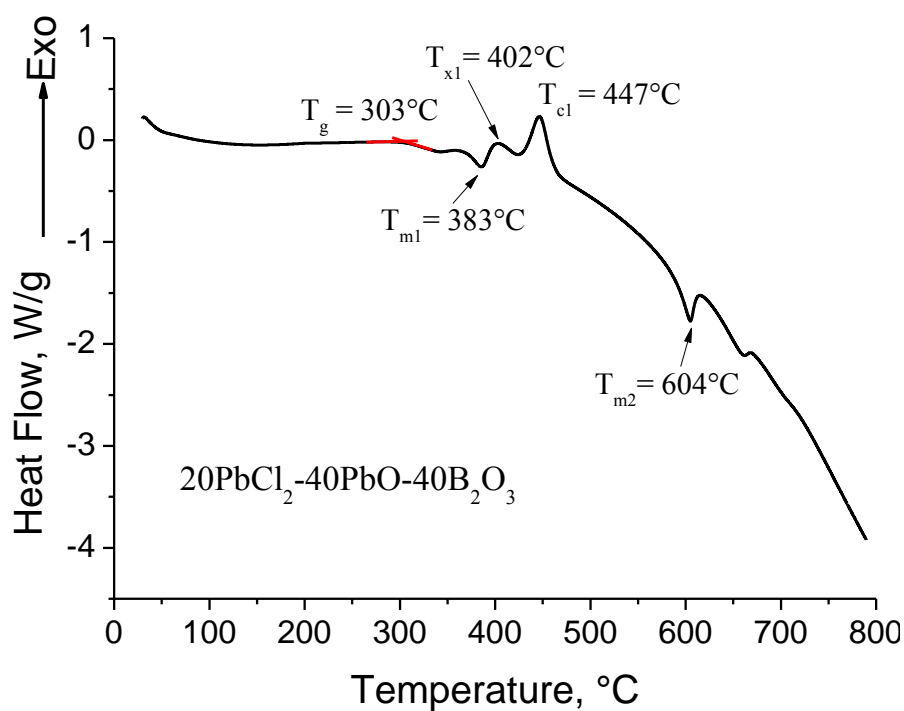

**Figure S8.** DSC curve for glass composition 20PbCl<sub>2</sub>-40PbO-40B<sub>2</sub>O<sub>3</sub>, and characteristic temperatures marked on it.

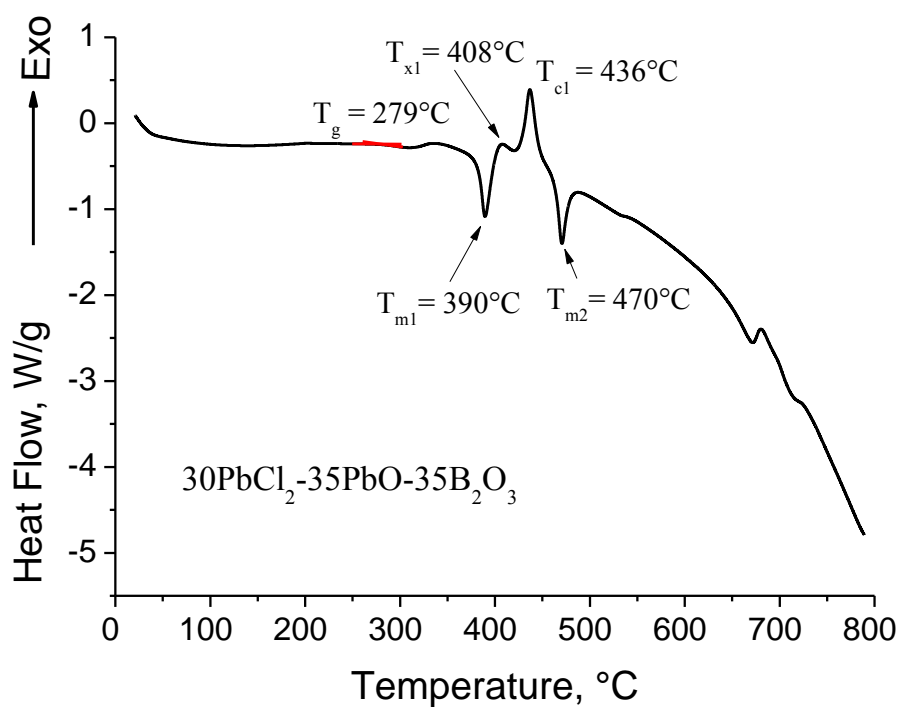

**Figure S9.** DSC curve for glass composition 30PbCl<sub>2</sub>-35PbO-35B<sub>2</sub>O<sub>3</sub>, and characteristic temperatures marked on it.

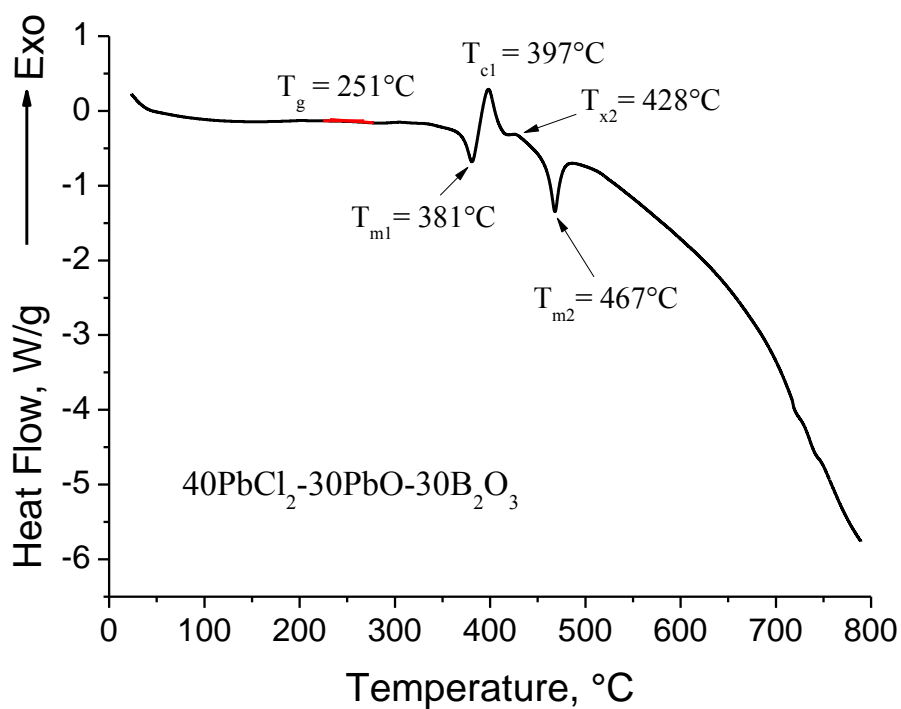

**Figure S10.** DSC curve for glass composition 40PbCl<sub>2</sub>-30PbO-30B<sub>2</sub>O<sub>3</sub>, and characteristic temperatures marked on it.

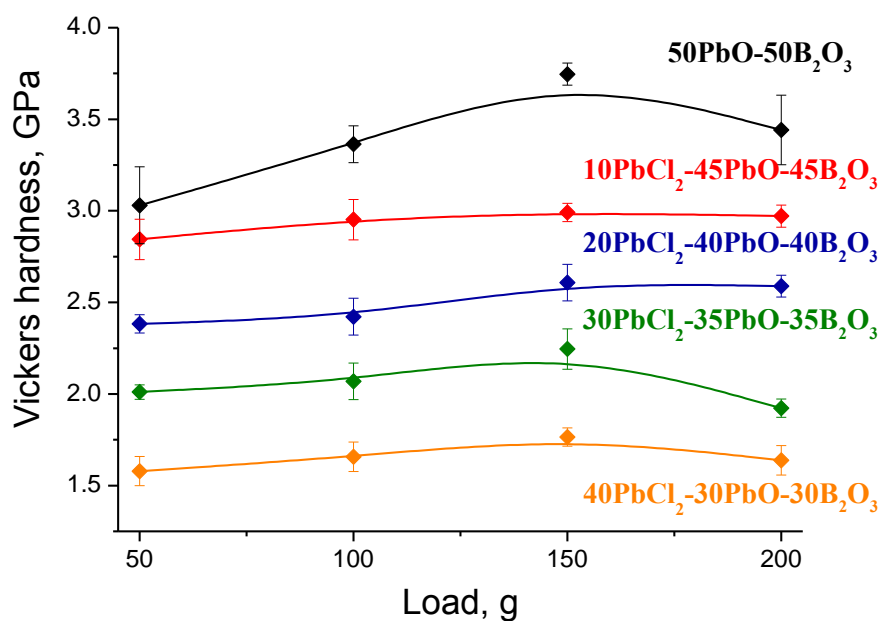

**Figure S11.** Dependence of Vickers hardness on the applied load  $x\text{PbCl}_2-(50-0.5x)\text{PbO}-(50-0.5x)\text{B}_2\text{O}_3$  glasses.

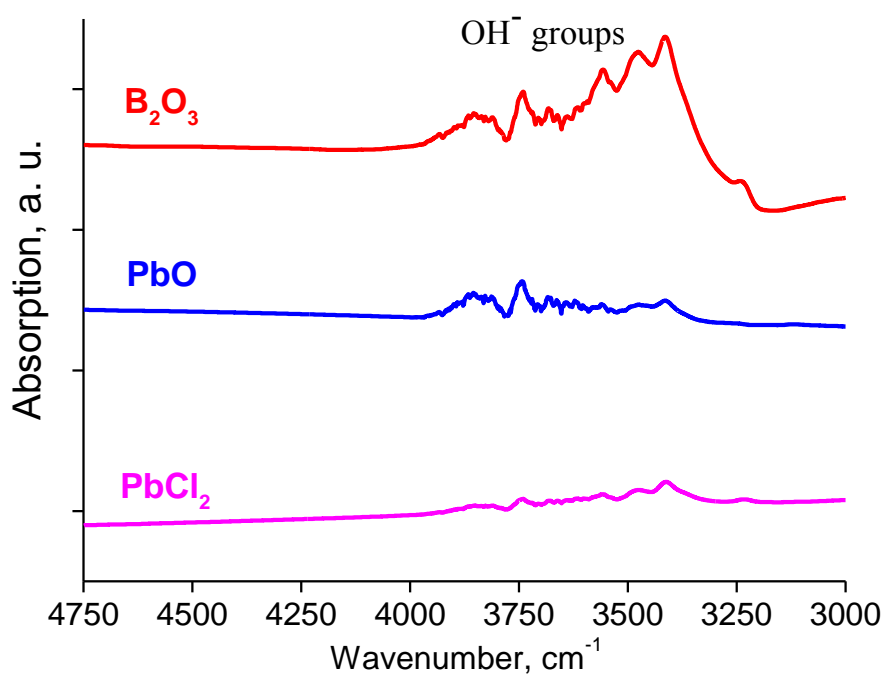

**Figure S12.** FT-IR spectra of the initial reagents, with the indicated band of OH<sup>-</sup> groups.

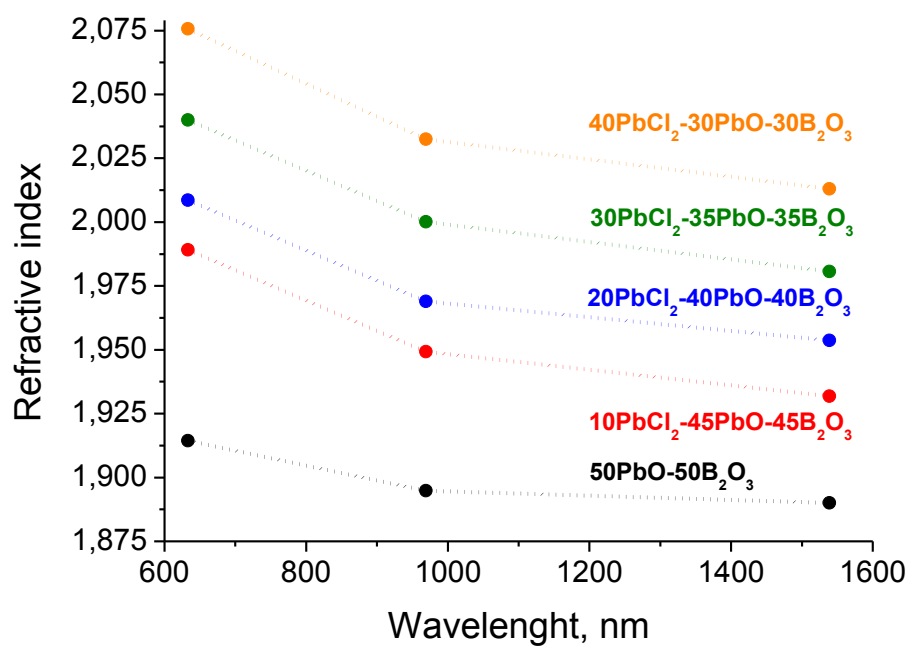

**Figure S13.** The dispersion of the refractive index of  $x\text{PbCl}_2-(50-0.5x)\text{PbO}-(50-0.5x)\text{B}_2\text{O}_3$  glasses.
